# Supplementary material for: Akkermansia muciniphila promotes type H vessel formation and bone fracture healing by reducing gut permeability and inflammation
Source: PubMed Central journal article supplement (PMC7725610; doi:10.1242/dmm.043620), 2020-12-01
Supplement: dmm-13-043620-s1.pdf [file dmm-13-043620-s1.pdf]

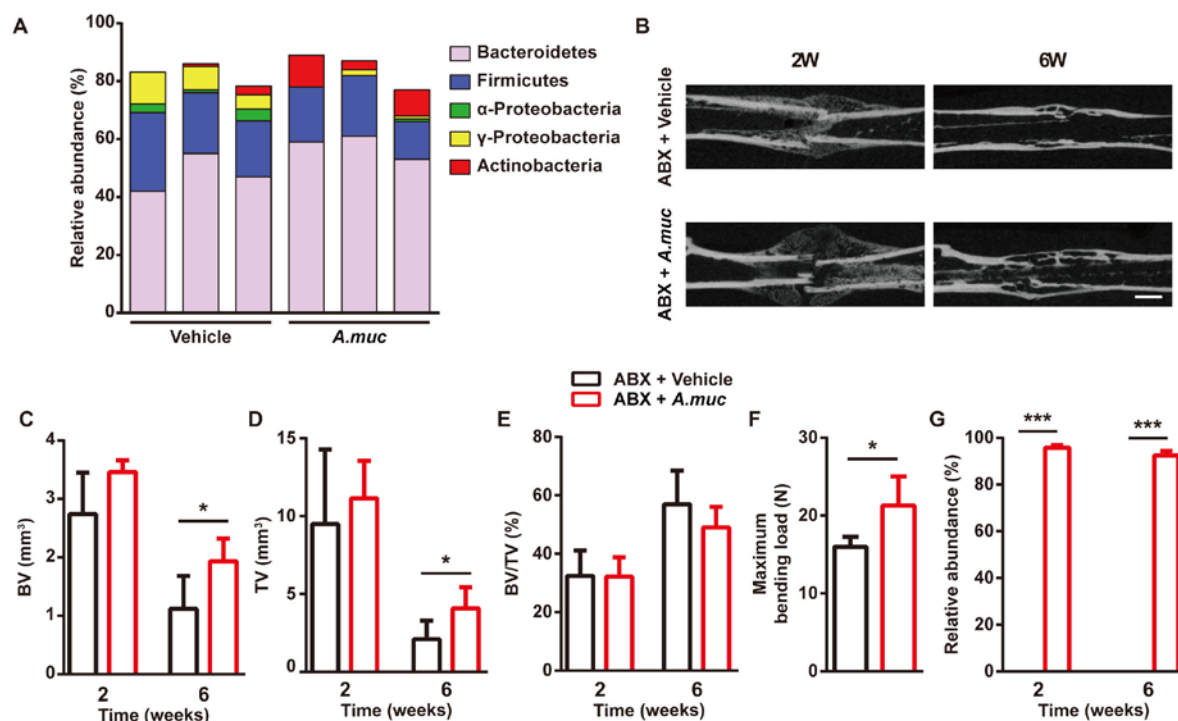

**Fig. S1. *A. muc* improves bone repair in gut microbiota-depleted mice.** (A)

Fecal microbiota composition of vehicle-treated group and *A. muc*-treated group evaluated by 16S rDNA qRT-PCR.  $n = 3$  per group. (B) Representative  $\mu$ CT images of fractured femora from ABX + vehicle and ABX + *A. muc* group mice at 2 and 6 weeks. Scale bar: 1 mm. (C-E)  $\mu$ CT quantitative analyses of BV (C), TV (D) and BV/TV (E) of fractured femora at 2 and 6 WPF.  $n = 5$  per group. (F) Four-point bending measurement of femoral ultimate load at 6 WPF.  $n = 5$  per group. (G) Abundances of *A. muc* in fecal samples of ABX + vehicle and ABX + *A. muc* group mice.  $n = 5$  per group. \* $P < 0.05$ , \*\*\* $P < 0.001$  by unpaired two tailed Student's  $t$  test.

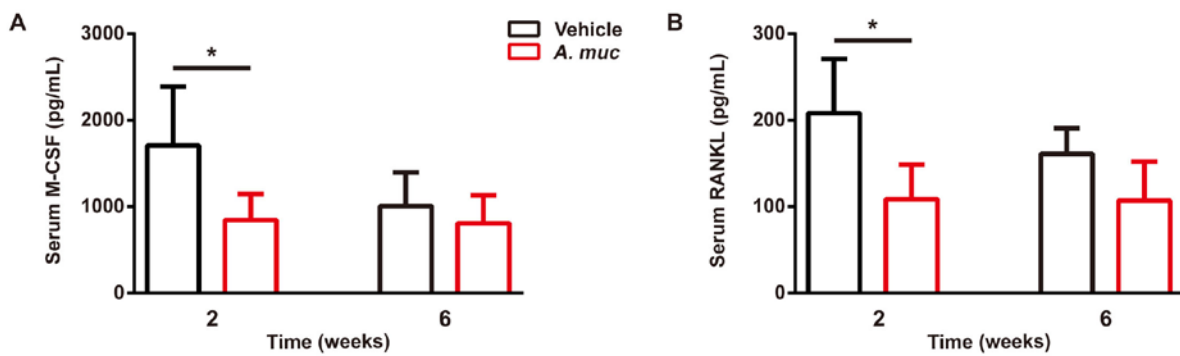

**Fig. S2. *A. muc* decreases circulatory levels of M-CSF and RANKL.** (A)

Serum concentrations of M-CSF (A) and RANKL (B) detected by ELISA at 2 and 6 WPF.  $n = 5$  per group. \*  $P < 0.05$  by unpaired two tailed Student's  $t$  test.

**Table S1: Primers used for 16S rDNA qRT-PCR in Figure S1**

| Target group             | Primer sequence                              |
|--------------------------|----------------------------------------------|
| Universal                | AAACTCAAAGAATTGACGG<br>CTCACRRCACGAGCTGAC    |
| $\alpha$ -Proteobacteria | CIAGTGTAGAGGTGAAATT<br>CCCCGTCAATTCCTTTGAGTT |
| $\gamma$ -Proteobacteria | TCGTCAGCTCGTGTGTGA<br>CGTAAGGGCCATGATG       |
| Bacteroidetes            | CRAACAGGATTAGATACCCT<br>GGTAAGGTTCCCTCGGTAT  |
| Firmicutes               | TGAAACTYAAAGGAATTGACG<br>ACCATGCACCACCTGTC   |
| Actinobacteria           | TACGGCCGCAAGGCTA<br>TCRTCCCCACCTTCCTCCG      |
